# Supplementary material for: Current recommendations/practices for anonymising data from clinical trials in order to make it available for sharing: A scoping review
Source: PubMed Central journal article supplement (PMC9373195; doi:10.1177/17407745221087469), 2022-06-22
Supplement: sj-pdf-1-ctj-10.1177_17407745221087469.pdf [file sj-pdf-1-ctj-10.1177_17407745221087469.pdf]

**Current recommendations/practices for anonymising data from clinical trials in order to make it available for sharing: Protocol for a scoping review**

1 Rodriguez A<sup>1</sup>, Tuck C.<sup>1</sup>, Dozier MF<sup>2</sup>, Lewis SC<sup>1</sup>, Eldridge S<sup>3</sup>, Weir CJ<sup>1</sup>

2 <sup>1</sup>Edinburgh Clinical Trials Unit, Usher Institute of Population Health Sciences and  
3 Informatics, the University of Edinburgh

4 <sup>2</sup>Library & University Collections, Information Services, the University of Edinburgh

5 <sup>3</sup>Pragmatic Clinical Trials Unit, Blizard Institute, Barts and the London School of  
6 Medicine and Dentistry, Queen Mary University of London

7

8 Correspondence:

9 Ms Aryelly Rodriguez

10 Edinburgh Clinical Trials Unit, the University of Edinburgh

11 Level 2, Nine Edinburgh BioQuarter,

12 9 Little France Road, Edinburgh, EH16 4UX

13 Emails: [aryelly.rodriquez@ed.ac.uk](mailto:aryelly.rodriquez@ed.ac.uk), [chris.tuck@ed.ac.uk](mailto:chris.tuck@ed.ac.uk), [marshall.dozier@ed.ac.uk](mailto:marshall.dozier@ed.ac.uk)

14 [steff.lewis@ed.ac.uk](mailto:steff.lewis@ed.ac.uk), [christopher.weir@ed.ac.uk](mailto:christopher.weir@ed.ac.uk), [s.eldridge@qmul.ac.uk](mailto:s.eldridge@qmul.ac.uk)

15

16

17 **Protocol registration**

18 The protocol will not be registered with the International Prospective Register of Systematic  
19 Reviews (PROSPERO) as the proposed systematic review does not meet the PROSPERO  
20 inclusion criteria.

21

22

**Current recommendations/practices for anonymising data from clinical trials in order to make it available for sharing: Protocol for a scoping review**

23 **Abstract**

24 There are increasing pressures for anonymised datasets from clinical trials to be shared  
25 across the scientific community. There are various sets of recommendations on how to  
26 perform anonymisation prior to sharing clinical trial data. We aim to systematically identify,  
27 describe and synthesise these recommendations. We will systematically search literature  
28 databases and websites of key organisations in the field. Any publication reporting  
29 recommendations on anonymisation to enable data sharing in clinical trials will be included.  
30 Two reviewers will independently screen titles, abstracts and full text for eligibility. One  
31 reviewer will extract data from included papers which will then be sense checked by a second  
32 reviewer. Results will be summarised by narrative review. This scoping review will provide  
33 information about existing recommendations for anonymising clinical trial datasets in order to  
34 make them available for sharing and it will inform (if applicable) the development of new  
35 recommendations.

36

37

38 Key Words: Clinical Trials | Systematic Review | Data Anonymization | Patient Identification  
39 Systems | Personally Identifiable Information | Datasets | Data Curation | Guidelines

40

**Current recommendations/practices for anonymising data from clinical trials in order to make it available for sharing: Protocol for a scoping review**

41 **Background**

42 When academic-led clinical trials are completed, their results are usually released to the public  
43 and wider scientific community in scientific journals or clinical trials registries. However,  
44 generally, there are considerable amounts of data that are not analysed as part of the final  
45 report [1]. In addition, it is often useful to perform meta-analyses across several trials and  
46 using the individual patient data from each trial adds to the quality of such analyses [2], for  
47 instance by allowing full investigation of subgroup effects. Clinical trials are complex, time-  
48 consuming and costly, and it is wasteful not to use data fully [3]. There is now a drive,  
49 particularly from publishers and funders, to encourage the release of relevant anonymised trial  
50 data sets [4].

51 Clinical trial datasets contain personal health information on the trial participants. It is  
52 imperative that data sharing does not disclose personal data to anyone who falls outside the  
53 original group to whom the trial participants consented to disclose their data. Anonymising the  
54 trial dataset fulfils this requirement. However, the anonymisation process removes information  
55 from the data, and if not done properly, the original trial analyses could not be reproduced,  
56 which in turn will limit the data's usability for further research [5]. Anonymisation is complex,  
57 and there are many possible ways of performing it.

58 The drive to share data more widely has generated various sets of recommendations to enable  
59 sharing [4, 6-9]. Embedded within these, there is a variety of recommendations on how to  
60 anonymise a dataset.

61 **Why it is important to do this review**

62 To our knowledge, there are no reviews of the methods and/or recommendations for the  
63 process of generating anonymised clinical trial datasets<sup>1</sup>. To understand and bring together

---

<sup>1</sup> A quick search was executed on the 07JAN2019 on Google Scholar with "literature" "review" "anonymization" "methods" "clinical trials" and also "literature" "review" "anonymisation" "methods" "clinical trials", the first 100 results were screened for each search and relevant results were not found

**Current recommendations/practices for anonymising data from clinical trials in order to make it available for sharing: Protocol for a scoping review**

64 the techniques used or recommended for data anonymisation in clinical trials, a systematic  
65 review is required.

66

67 **Objective**

68 To identify, describe and synthesise the existing methods/recommendations to anonymise  
69 datasets from clinical trials.

70

71 **Methods**

72 The Preferred Reporting Items for Systematic Review and Meta-Analysis Protocols (PRISMA-  
73 P) guidance [10] and the Joanna Briggs Institute Reviewers' Manual: 2015 edition/  
74 supplement/ Methodology for JBI Scoping Reviews [11] were followed for the development  
75 of the protocol, where relevant to a methodology systematic review such as this.

76

77 **Types of publications**

78 We will include publications giving recommendations on anonymising datasets from clinical  
79 trials in any therapeutic area. Non-empirical publications such as editorials, expert views or  
80 practice guidelines will also be included in this review

81

82 **Type of Outcomes**

83 The primary outcome is the reported methods and/or recommendations for anonymisation of  
84 clinical trials datasets.

85

86 **Search methods for identification of publications**

87 We will perform a comprehensive systematic search to identify publications reporting methods  
88 or recommendations for anonymising clinical trials datasets. No language restrictions will be  
89 used. Non-English publications will be initially translated into English using Google

**Current recommendations/practices for anonymising data from clinical trials in order to make it available for sharing: Protocol for a scoping review**

90 Translate [12]. If they seem relevant, they will be fully translated as local expertise and  
91 resources allow, and any literature that we are unable to translate will be declared. The time  
92 period of the execution of the searches will be reported

93 **Electronic Searches**

94 Web of Science, Medline (including non-indexed and in-process records), and Embase  
95 databases will be searched from inception to the present day.

96 The search strategy will use the following key concept areas, adopting subject headings and  
97 keywords as relevant for each database:

|                                                                                                                                                                                                                                   |
|-----------------------------------------------------------------------------------------------------------------------------------------------------------------------------------------------------------------------------------|
| (Clinical) and (trial* or randomi* or research* or control*) and<br>(principle* or guid* or recomm*) and<br>(shar* or reus* or re-us* or access* or open) and<br>(de-identi* or deidenti* or anonym* or privacy or confidential*) |
|-----------------------------------------------------------------------------------------------------------------------------------------------------------------------------------------------------------------------------------|

98 An example of a detailed electronic search strategy is presented in Appendix 1

99 **Searching other resources**

100 In order to ensure the comprehensiveness of our search, the websites of major

- 101 • Research governance organisations,
- 102 • Public research funding bodies and charities, and
- 103 • Academic clinical trials units

104 will be searched to find guidelines published as grey literature, so as not to omit documents  
105 not published as journal articles and not indexed in the bibliographic databases.

106 To further supplement our search yield, we will use backwards and forward citation searching  
107 on the retrieved documents in order to find additional sources. Also, experts and authors  
108 known to have published relevant work will be contacted to identify further literature.

109

**Current recommendations/practices for anonymising data from clinical trials in order to make it available for sharing: Protocol for a scoping review**

110 **Data collection and analysis**

111 **Selection of publications**

112 Records will be retrieved and transferred into a reference manager (e.g. EndNote [13] or  
113 Citavi [14]), which will be used for de-duplication and to maintain a master library of the  
114 records throughout the review process. Two reviewers (AR, CT) will independently screen  
115 titles and abstracts for eligibility. Full text copies of all potentially relevant records will be  
116 obtained. Two reviewers (AR, CT) will independently assess whether each full text record  
117 meets the inclusion criteria. Covidence software [15] will be used for screening. Any  
118 discrepancies will be discussed between the reviewers and if agreement cannot be reached  
119 then it will be arbitrated by a third reviewer (SCL, CJW or SE)

120 Publications will be excluded if:

- 121 1. They do not have concrete recommendations/methods of anonymisation.
- 122 2. Are not from a clinical trial framework
- 123 3. Are focused on omics data or big data

124 **Data extraction and management**

125 A data extraction form to collect relevant data items from eligible sources will be developed  
126 and piloted in line with Cochrane guidance [16], this will include (but it is not limited to):

- 127 • Publication details (Authors names, Journal, year)
- 128 • Publication context (Country, main therapeutic area (if applicable))
- 129 • All listed recommendations/methods on anonymisation.

130 Data extraction will be undertaken by one reviewer (AR) who will manually extract relevant  
131 data from each included publication onto the data extraction form, which will be sense checked  
132 independently by a second reviewer (CT). Any discrepancies will be discussed between the  
133 reviewers and if agreement cannot be reached then it will be resolved by a third reviewer

**Current recommendations/practices for anonymising data from clinical trials in order to make it available for sharing: Protocol for a scoping review**

134 (SCL, CJW or SE). Data extracted will be managed and coded using a qualitative research  
135 software (e.g. NVivo® [17] or Citavi [14]).

136 **Data synthesis**

137 Data from the included publication will be summarised in descriptive tables.

138 Results will be summarised by narrative review and if applicable descriptive statistics.

139

140 **Conclusions**

141 Currently there is a strong demand for academic researchers to share their research data  
142 more readily. In clinical trials, data can be shared more widely if they are anonymised,  
143 yet we do not have standardised recommendations on how to do this. To the best of our  
144 knowledge, this will be the first systematic review of these emerging  
145 recommendations/techniques. We will gather and describe all the identified  
146 recommendations and we will provide a map for future research regarding anonymisation  
147 of datasets in clinical trials to enable data sharing.

148

149 **Ethics and dissemination**

150 This project will not collect any patient data or outcomes; therefore, it will not be necessary  
151 to seek formal National Health Service Research Ethics Committee's approval. However,  
152 we will apply for ethical approval from the Internal Ethics Review Board at The University  
153 of Edinburgh's Usher Institute. Findings from the review will be presented at scientific  
154 conferences and if possible, will be published in a peer-reviewed journal.

155

**Current recommendations/practices for anonymising data from clinical trials in order to make it available for sharing: Protocol for a scoping review**

156 **Conflicts of Interests**

157 The authors declare no competing interests.

158

159 **Funding**

160 AR has a scholarship from the University of Edinburgh to undertake a PhD with the support  
161 from the Asthma UK Centre for Applied Research (AUKCAR). Neither funder (University of  
162 Edinburgh) nor sponsor (AUKCAR) contributed to protocol development. CJW is supported in  
163 this work by NHS Lothian via the Edinburgh Clinical Trials Unit.

164 SCL and CT are supported in this work by their employment at the Edinburgh Clinical Trials  
165 Unit.

166 SE is supported in this work by her employment at the Pragmatic Clinical Trials Unit.

167 MFD is supported in this work by her employment at the University of Edinburgh.

168

169 **Author contributions**

170 AR, SCL and CJW conceived the idea for this work supported by SE, MFD and TC. AR wrote  
171 the first draft, and all authors contributed to the article.

172



**Current recommendations/practices for anonymising data from clinical trials in order to make it available for sharing: Protocol for a scoping review**

173

174 **Appendix 1. Search Strategy**

175 Medline (Ovid)

176 1. (clinical adj2 (trial\* or randomi\* or research\* or control\*)).mp.

177 2. (principle\* or guid\* or recomm\*).mp. [mp=title, abstract, original title, name of substance  
178 word, subject heading word, floating sub-heading word, keyword heading word, protocol  
179 supplementary concept word, rare disease supplementary concept word, unique identifier,  
180 synonyms]

181 3. (shar\* or reus\* or re-us\* or access\* or open).mp. [mp=title, abstract, original title, name of  
182 substance word, subject heading word, floating sub-heading word, keyword heading word,  
183 protocol supplementary concept word, rare disease supplementary concept word, unique  
184 identifier, synonyms]

185 4. Data Anonymization/

186 5. (de-identi\* or deidenti\* or anonym\* or privacy or confidential\*).mp. [mp=title, abstract,  
187 original title, name of substance word, subject heading word, floating sub-heading word,  
188 keyword heading word, protocol supplementary concept word, rare disease supplementary  
189 concept word, unique identifier, synonyms]

190 6. 4 or 5

191 7. 1 and 2 and 3 and 6

192

193

**Current recommendations/practices for anonymising data from clinical trials in order to make it available for sharing: Protocol for a scoping review**

194

195

196

197

198

199

200

201

202

203

204

205

206

207

208

209

210

211

212

213

214

215

216

217

218

219

220

221

222

223

224

225

226

227

228

229

230

### Reference List

1. Song, F., L. Hooper, and Y. Loke, *Publication bias: what is it? How do we measure it? How do we avoid it?* Open Access Journal of Clinical Trials, 2013. **2013**(5): p. 71-81.
2. Berlin, J.A., et al., *Bumps and bridges on the road to responsible sharing of clinical trial data.* Clinical Trials, 2014. **11**(1): p. 7-12.
3. Chan, A.-W., et al., *Increasing value and reducing waste: addressing inaccessible research.* The Lancet, 2014. **383**(9913): p. 257-266.
4. Ohmann, C., et al., *Sharing and reuse of individual participant data from clinical trials: principles and recommendations.* BMJ Open, 2017. **7**(12).
5. El Emam, K. and L. Arbuckle, *Anonymizing health data : case studies and methods to get you started.* 2013: O'Reilly Media, Inc.
6. Hrynaskiewicz, I., et al., *Preparing raw clinical data for publication trials.* Trials, 2010 **11**:9.
7. Information Commissioner's Office (ICO), *Anonymisation code of practice.* 2012: UK.
8. Keerie, C., et al., *Data sharing in clinical trials - practical guidance on anonymising trial datasets.* Trials, 2018. **19**(1): p. 25.
9. Tudur Smith, C., et al., *Good Practice Principles for Sharing Individual Participant Data from Publicly Funded Clinical Trials.* 2015: UK.
10. Moher, D.S., L.; Clarke, M.; Ghersi, D.; Liberati, A.; Petticrew, M.; Shekelle, P.; Stewart, L., *Preferred Reporting Items for Systematic Review and Meta-Analysis Protocols (PRISMA-P) 2015 statement.* Syst Rev, 2015. **4**(1).
11. The Joanna Briggs Institute, *Joanna Briggs Institute Reviewers' Manual: 2015 edition / Supplement*, in *Methodology for JBI Scoping Reviews.* 2015, The Joanna Briggs Institute.
12. Google. *Google Translate.* Available from: <https://translate.google.com/>.
13. Clarivate Analytics. *EndNote.* Available from: <https://endnote.com/>.
14. Swiss Academic Software. *CITAVI.* Available from: <https://www.citavi.com/en>.
15. Covidence. *Covidence.* Available from: <https://www.covidence.org/home>.
16. Higgins, J.P.T. and S. Green, *Cochrane Handbook for Systematic Reviews of Interventions.* 2011, The Cochrane Collaboration.
17. QSR International. *NVIVO.* Available from: <https://www.qsrinternational.com/nvivo/home>.
